# Supplementary material
Source: PubMed Central journal article supplement (PMC1691189)
Supplement: 12573073s01.pdf [file 12573073s01.pdf]

This is an electronic appendix to the paper by Lima *et al.* 2002 Population dynamics of a South American rodent: seasonal structure interacting with climate, density dependence and predator effects. *Proc. R. Soc. Lond. B* **269**, 2579—2586. (DOI 10.1098/rspb.2002.2142.)

Electronic appendices are refereed with the text. However, no attempt is made to impose a uniform editorial style on the electronic appendices.

### Electronic Appendix A

Statistical models tested are denoted according to each model specific-variation in survival ( $\phi = \text{Phi}$ ), capture ( $p$ ), seniority probabilities ( $\gamma = \text{Gamma}$ ), and population growth rate ( $\lambda = \text{Lambda}$ ) for females.  $t$  denotes full time-specific variation,  $(m)$  denotes monthly time-specific variation,  $(\text{year})$  denotes between-year variation,  $(\text{season})$  denotes seasonal (breeding and non-breeding) variation,  $(\cdot)$  denotes no time-specific variation (a single value estimated for all time periods).  $\text{AIC}_c$  is the estimated AIC (Akaike's information criterion): lower values indicate more parsimonious models. Boldface indicates the selected model.

| <b>Model</b>                                                      | <b>AICc</b>    | <b><math>\Delta\text{AICc}</math></b> | <b>Weight</b> | <b>#Par</b> | <b>Deviance</b> |
|-------------------------------------------------------------------|----------------|---------------------------------------|---------------|-------------|-----------------|
| <b>{<math>\phi(\text{seasonal} + \text{year})p(\cdot)</math>}</b> | <b>2633.21</b> | <b>0.00</b>                           | <b>1.00</b>   | <b>29</b>   | <b>2129.55</b>  |
| { $\phi(m+\text{year})p(\cdot)$ }                                 | 2658.74        | 25.53                                 | 0.00          | 27          | 2229.21         |
| { $\phi(\text{year})p(\cdot)$ }                                   | 2672.64        | 39.42                                 | 0.00          | 15          | 2267.71         |
| { $\phi(t)p(\cdot)$ }                                             | 2686.71        | 53.50                                 | 0.00          | 106         | 2086.15         |
| { $\phi(m)p(\cdot)$ }                                             | 2788.98        | 155.76                                | 0.00          | 13          | 2388.12         |
| { $\phi(\cdot)p(\cdot)$ }                                         | 2893.83        | 260.62                                | 0.00          | 2           | 2515.17         |

| <b>Model</b>                                      | <b>AICc</b> | <b><math>\Delta</math>AICc</b> | <b>Weight</b> | <b>#Par</b> | <b>Deviance</b> |
|---------------------------------------------------|-------------|--------------------------------|---------------|-------------|-----------------|
| { $\gamma(\text{season} + \text{year})p(\cdot)$ } | 2942.41     | 0.00                           | 0.894         | 29          | 2508.75         |
| { $\gamma(\text{m}+\text{year})p(\cdot)$ }        | 2946.68     | 4.26                           | 0.105         | 25          | 2521.27         |
| { $\gamma(\text{year})p(\cdot)$ }                 | 2985.82     | 43.41                          | 0.00          | 14          | 2582.93         |
| { $\gamma(\text{t})p(\cdot)$ }                    | 3018.59     | 76.18                          | 0.00          | 106         | 2418.08         |
| { $\gamma(\text{m})\}p(\cdot)$ }                  | 3081.50     | 139.08                         | 0.00          | 13          | 2680.64         |
| { $\gamma(\cdot)p(\cdot)$ }                       | 3229.89     | 287.47                         | 0.00          | 2           | 2851.23         |

| <b>Model</b>                                                                       | <b>AICc</b>     | <b><math>\Delta</math>AICc</b> | <b>Weight</b> | <b>#Par</b> | <b>Deviance</b> |
|------------------------------------------------------------------------------------|-----------------|--------------------------------|---------------|-------------|-----------------|
| { $\phi(\text{season} + \text{year})p(\cdot)\gamma(\text{season} + \text{year})$ } | <b>15303.20</b> | <b>0.00</b>                    | <b>1.00</b>   | <b>57</b>   | <b>14810.63</b> |
| { $\phi(\text{m} + \text{year})p(\cdot)\gamma(\text{m} + \text{year})$ }           | 15382.75        | 79.55                          | 0.00          | 53          | 14898.72        |
| { $\phi(\text{m} + \text{year})p(\cdot)\gamma(\text{m})$ }                         | 15827.02        | 523.81                         | 0.00          | 39          | 15372.54        |
| { $\phi(\text{t})p(\cdot)\gamma(\cdot)$ }                                          | 15834.74        | 531.54                         | 0.00          | 101         | 15245.54        |
